# Supplementary material for: Experimental observation of TiN12+ cluster and theoretical investigation of its stable and metastable isomers
Source: Royal Society of Chemistry journal article supplement (doi:10.1039/c5sc01103e), 2015-01-01
Supplement: c5sc01103e1.pdf [file c5sc01103e1.pdf]

## Supporting Information

### Experimental Observation of $\text{TiN}_{12}^+$ Cluster and Theoretical Investigation of Its Stable and Metastable Isomers

Ke-Wei Ding,<sup>a</sup> Xiao-Wei Li,<sup>b,c</sup> Hong-Guang Xu,<sup>d</sup> Tao-Qi Li,<sup>\*a</sup> Zhong-Xue Ge,<sup>\*a</sup>  
Qian Wang,<sup>\*c</sup> and Wei-Jun Zheng<sup>\*d</sup>

<sup>a</sup> Xi'an Modern Chemistry Research Institute, Xi'an 710065, China

E-mail: [thankli64@163.com](mailto:thankli64@163.com), [gzx204@sina.com.cn](mailto:gzx204@sina.com.cn),

<sup>b</sup> National Laboratory of Mineral Materials, School of Materials Science and Technology, China University of Geosciences, Beijing 100083, China

<sup>c</sup> Center for Applied Physics and Technology, College of Engineering, Peking University, Beijing 100871, China E-mail: [qianwang2@pku.edu.cn](mailto:qianwang2@pku.edu.cn)

<sup>d</sup> State Key Laboratory of Molecular Reaction Dynamics, Institute of Chemistry, Chinese Academy of Sciences, Beijing 100190, China E-mail: [zhengwj@iccas.ac.cn](mailto:zhengwj@iccas.ac.cn)

**Table S1** NBO data for TiN<sub>2</sub> (LP: lone pair; BD: bonding; BD\*: antibonding; E<sub>2</sub>: stabilization energy)

| NPA (Natural Population Analysis)       |                                                                                                |                                                |                           |                |
|-----------------------------------------|------------------------------------------------------------------------------------------------|------------------------------------------------|---------------------------|----------------|
| Atom                                    | Natural Electron Configuration                                                                 |                                                |                           | Natural Charge |
| Ti                                      | 3d <sup>2.50</sup> 4s <sup>0.93</sup> 4p <sup>0.08</sup>                                       |                                                |                           | 0.499          |
| N1                                      | 2s <sup>1.54</sup> 2p <sup>3.87</sup> 3s <sup>0.02</sup> 3p <sup>0.02</sup>                    |                                                |                           | -0.452         |
| N2                                      | 2s <sup>1.62</sup> 2p <sup>3.39</sup> 3s <sup>0.01</sup> 3p <sup>0.01</sup> 3d <sup>0.01</sup> |                                                |                           | -0.048         |
| Main BO (Bond Orbital) analysis         |                                                                                                |                                                |                           |                |
| Bond Orbital                            | Occupancy(e)                                                                                   | Hybridization                                  |                           | Spin           |
| BD(1)N1-N2                              | 0.99975                                                                                        | N1: p 99.90%; N2: p 99.53%                     |                           | Up             |
| BD(2)N1-N2                              | 0.99975                                                                                        | N1: p 99.90%; N2: p 99.53%                     |                           |                |
| BD(3)N1-N2                              | 0.99983                                                                                        | N1: s 40.63%, p 59.31%; N2: s 34.65%, p 64.98% |                           |                |
| LP(1)Ti                                 | 0.99997                                                                                        | d 100%                                         |                           |                |
| LP(2)Ti                                 | 0.99916                                                                                        | s 89.12%, p 5.96%, d 4.92%                     |                           |                |
| LP(3)Ti                                 | 0.67637                                                                                        | d 99.51%                                       |                           |                |
| LP(4)Ti                                 | 0.67637                                                                                        | d 99.51%                                       |                           |                |
| LP*(5)Ti                                | 0.07212                                                                                        | s 9.81%, p 13.64%, d 76.34%                    |                           |                |
| LP(1)N1                                 | 0.93292                                                                                        | s 60.25%, p 39.75%                             |                           |                |
| LP(1)N2                                 | 0.99108                                                                                        | s 66.16%, p 33.78%                             |                           |                |
| BD*(1)N1-N2                             | 0.31628                                                                                        | N1: p 99.90%; N2: p 99.53%                     |                           | Down           |
| BD*(2)N1-N2                             | 0.31628                                                                                        | N1: p 99.90%; N2: p 99.53%                     |                           |                |
| BD(1)N1-N2                              | 0.99896                                                                                        | N1: s 40.92%, p 59.03%; N2: s 35.86%, p 63.72% |                           |                |
| BD(2)N1-N2                              | 0.99575                                                                                        | N1: p 99.91%; N2: p 99.33%                     |                           |                |
| BD(3)N1-N2                              | 0.99575                                                                                        | N1: p 99.91%; N2: p 99.33%                     |                           |                |
| LP*(1)Ti                                | 0.07632                                                                                        | s 44.00%, p 5.94%, d 49.88%                    |                           |                |
| LP(1)N1                                 | 0.92921                                                                                        | s 60.02%, p 39.98%                             |                           |                |
| LP(1)N2                                 | 0.98899                                                                                        | s 64.88%, p 35.09%                             |                           |                |
| Main second order Perturbation analysis |                                                                                                |                                                |                           |                |
| Donor                                   | Acceptor                                                                                       | Transferred charge                             | E <sub>2</sub> (kcal/mol) | Spin           |
| LP(3)Ti                                 | BD*(1)N1-N2                                                                                    | 0.32                                           | 41.94                     | Up             |
| LP(4)Ti                                 | BD*(2)N1-N2                                                                                    | 0.32                                           | 41.94                     |                |
| LP(1)N1                                 | LP*(5)Ti                                                                                       | 0.072                                          | 28.55                     | Down           |
| LP(1)N1                                 | LP*(1)Ti                                                                                       | 0.072                                          | 31.01                     |                |

**Table S2** NBO data for  $\text{TiN}_2^+$  (LP: lone pair; BD: bonding; BD\*: antibonding;  $E_2$ : stabilization energy)

| NPA(Natural Population Analysis)        |                                        |                                                |                  |                |
|-----------------------------------------|----------------------------------------|------------------------------------------------|------------------|----------------|
| Atom                                    | Natural Electron Configuration         |                                                |                  | Natural Charge |
| Ti                                      | $3d^{2.25}4s^{0.72}4p^{0.01}$          |                                                |                  | 1.026          |
| N1                                      | $2s^{1.55}2p^{3.65}3s^{0.03}3p^{0.01}$ |                                                |                  | -0.242         |
| N2                                      | $2s^{1.62}2p^{3.13}3s^{0.01}3d^{0.02}$ |                                                |                  | 0.216          |
| Main BO(Bond Orbital) analysis          |                                        |                                                |                  |                |
| Bond Orbital                            | Occupancy(e)                           | Hybridization                                  |                  | Spin           |
| BD(1)N1-N2                              | 0.99998                                | N1: p 99.88%; N2: p 99.30%                     |                  | up             |
| BD(2)N1-N2                              | 0.99998                                | N1: p 99.88%; N2: p 99.30%                     |                  |                |
| BD(3)N1-N2                              | 0.99961                                | N1: s 42.51%, p 57.43%; N2: s 35.96%, p 63.61% |                  |                |
| LP(1)Ti                                 | 0.99961                                | s 68.06%, p 31.77%                             |                  |                |
| LP(2)Ti                                 | 0.94512                                | d 100%                                         |                  |                |
| LP(3)Ti                                 | 0.94512                                | d 100%                                         |                  |                |
| LP*(4)Ti                                | 0.04510                                | s 30.75%, p 6.93%, d 62.14%                    |                  |                |
| LP(1)N1                                 | 0.95614                                | s 58.69%, p 41.31%                             |                  |                |
| LP(1)N2                                 | 0.99254                                | s 64.92%, p 35.02%                             |                  |                |
| BD*(1)N1-N2                             | 0.05350                                | N1: p 99.88%; N2: p 99.30%                     |                  |                |
| BD*(2)N1-N2                             | 0.05350                                | N1: p 99.88%; N2: p 99.30%                     |                  | down           |
| BD(1)N1-N2                              | 0.99971                                | N1: s 42.34%, p 57.61%; N2: s 36.28%, p 63.27% |                  |                |
| BD(2)N1-N2                              | 0.99914                                | N1: p 99.89%; N2: p 99.25%                     |                  |                |
| BD(3)N1-N2                              | 0.99914                                | N1: p 99.89%; N2: p 99.25%                     |                  |                |
| LP*(1)Ti                                | 0.04020                                | s 54.78%, p 5.40%, d 39.62%                    |                  |                |
| LP(1)N1                                 | 0.96085                                | s 58.96%, p 41.04%                             |                  |                |
| LP(1)N2                                 | 0.99247                                | s 64.59%, p 35.36%                             |                  |                |
| Main second order Perturbation analysis |                                        |                                                |                  |                |
| Donor                                   | Acceptor                               | Transferred charge                             | $E_2$ (kcal/mol) | Spin           |
| LP(1)N1                                 | LP*(4)Ti                               | 0.045                                          | 15.92            | up             |
| LP(1)N1                                 | LP*(1)Ti                               | 0.040                                          | 14.94            | down           |

**Table S3** NBO data for TiN<sub>12</sub> (LP: lone pair; BD: bonding; BD\*: antibonding; E<sub>2</sub>: stabilization energy)

| NPA(Natural Population Analysis)        |                                                                                                                   |                                                                          |                |
|-----------------------------------------|-------------------------------------------------------------------------------------------------------------------|--------------------------------------------------------------------------|----------------|
| Atom                                    | Natural Electron Configuration                                                                                    |                                                                          | Natural Charge |
| Ti                                      | 3d <sup>2.72</sup> 4s <sup>0.30</sup> 4p <sup>0.58</sup> 4d <sup>0.01</sup> 5s <sup>0.01</sup> 5p <sup>0.01</sup> |                                                                          | 0.383          |
| N1                                      | 2s <sup>1.47</sup> 2p <sup>3.59</sup> 3s <sup>0.03</sup> 3p <sup>0.02</sup>                                       |                                                                          | -0.120         |
| N2                                      | 2s <sup>1.61</sup> 2p <sup>3.30</sup> 3s <sup>0.01</sup> 3p <sup>0.01</sup> 3d <sup>0.02</sup>                    |                                                                          | 0.056          |
| Main BO(Bond Orbital) analysis          |                                                                                                                   |                                                                          |                |
| Bond Orbital                            | Occupancy(e)                                                                                                      | Hybridization                                                            | Spin           |
| BD(1)N1-N2                              | 0.99831                                                                                                           | N1: p 99.88%; N2: p 99.40%                                               | up             |
| BD(2)N1-N2                              | 0.99827                                                                                                           | N1: p 99.76%; N2: p 99.31%                                               |                |
| BD(3)N1-N2                              | 0.99734                                                                                                           | N1: s 41.69%, p 58.25%; N2: s 36.48%, p 63.16%                           |                |
| BD(1)N1-Ti                              | 0.99485                                                                                                           | N1(88.69%): s 60.08%, p 39.92%; Ti(11.31%): s 16.66%, p 49.92%, d 33.34% |                |
| LP(1)N2                                 | 0.98996                                                                                                           | s 64.14%, p 35.81%                                                       |                |
| LP(1)Ti                                 | 0.60144                                                                                                           | d 100%                                                                   |                |
| LP(2)Ti                                 | 0.60134                                                                                                           | d 100%                                                                   |                |
| LP(3)Ti                                 | 0.53191                                                                                                           | d 99.95%                                                                 |                |
| BD*(1)N1-N2                             | 0.10160                                                                                                           | N1: p 99.88%; N2: p 99.40%                                               |                |
| BD*(2)N1-N2                             | 0.10457                                                                                                           | N1: p 99.76%; N2: p 99.31%                                               |                |
| BD(1)N1-N2                              | 0.99728                                                                                                           | N1: s 28.95%, p 70.98%; N2: s 25.68%, p 73.87%                           | down           |
| BD(2)N1-N2                              | 0.99717                                                                                                           | N1: s 12.44%, p 87.46%; N2: s 11.19%, p 88.26%                           |                |
| BD(3)N1-N2                              | 0.99553                                                                                                           | N1: p 99.89%; N2: p 99.33%                                               |                |
| BD(1)N1-Ti                              | 0.99524                                                                                                           | N1(89.19%): s 60.53%, p 39.47%; Ti(10.81%): s 16.65%, p 49.91%, d 33.35% |                |
| LP(1)N2                                 | 0.98985                                                                                                           | s 63.82%, p 36.14%                                                       |                |
| LP(1)Ti                                 | 0.45097                                                                                                           | d 99.99%                                                                 |                |
| BD*(2)N1-N2                             | 0.06306                                                                                                           | N1: s 12.44%, p 87.46%; N2: s 11.19%, p 88.26%                           |                |
| Main second order Perturbation analysis |                                                                                                                   |                                                                          |                |
| Donor                                   | Acceptor                                                                                                          | E <sub>2</sub> (kcal/mol)                                                | Spin           |
| BD*(2)N1-N2                             | BD*(1)N1-N2                                                                                                       | 26.34                                                                    | down           |

**Table S4** NBO data for  $\text{TiN}_{12}^+$  (LP: lone pair; BD: bonding; BD\*: antibonding;  $E_2$ : stabilization energy)

| NPA(Natural Population Analysis)                                      |                                                          |                                                                         |      |
|-----------------------------------------------------------------------|----------------------------------------------------------|-------------------------------------------------------------------------|------|
| Atom                                                                  | Natural Electron Configuration                           | Natural Charge                                                          |      |
| Ti                                                                    | $3d^{2.54}4s^{0.29}4p^{0.53}4d^{0.01}5s^{0.01}5p^{0.01}$ | 0.639                                                                   |      |
| N1                                                                    | $2s^{1.49}2p^{3.57}3s^{0.03}3p^{0.02}$                   | -0.118                                                                  |      |
| N2                                                                    | $2s^{1.61}2p^{3.17}3s^{0.01}3p^{0.01}3d^{0.02}$          | 0.178                                                                   |      |
| Main BO(Bond Orbital) analysis                                        |                                                          |                                                                         |      |
| Bond Orbital                                                          | Occupancy(e)                                             | Hybridization                                                           | Spin |
| BD(1)N1-N2                                                            | 0.99881                                                  | N1: p 99.87%; N2: p 99.33%                                              | up   |
| BD(2)N1-N2                                                            | 0.99881                                                  | N1: p 99.87%; N2: p 99.33%                                              |      |
| BD(3)N1-N2                                                            | 0.99797                                                  | N1: s 42.25%, p 57.69%; N2: s 36.23%, p 63.38%                          |      |
| BD(3)N1-Ti                                                            | 0.99535                                                  | N1(90.28%): s 59.54%, p 40.46%; Ti(9.72%): s 16.67%, p 49.94%, d 33.33% |      |
| LP(1)N2                                                               | 0.99076                                                  | s 64.54%, p 35.41%                                                      |      |
| LP(1)Ti                                                               | 0.71524                                                  | d 100%                                                                  |      |
| LP(2)Ti                                                               | 0.71516                                                  | d 100%                                                                  |      |
| LP(3)Ti                                                               | 0.71506                                                  | d 100%                                                                  |      |
| BD*(1)N1-N2                                                           | 0.06953                                                  | N1: p 99.87%; N2: p 99.33%                                              |      |
| BD*(2)N1-N2                                                           | 0.06953                                                  | N1: p 99.87%; N2: p 99.33%                                              |      |
| BD(1)N1-N2                                                            | 0.99796                                                  | N1: s 41.93%, p 58.01%; N2: s 36.61%, p 62.99%                          | down |
| BD(2)N1-N2                                                            | 0.99703                                                  | N1: p 99.88%; N2: p 99.28%                                              |      |
| BD(3)N1-N2                                                            | 0.99703                                                  | N1: p 99.88%; N2: p 99.28%                                              |      |
| LP(1)N1                                                               | 0.90663                                                  | s 59.89%, p 40.11%                                                      |      |
| LP(1)N2                                                               | 0.99071                                                  | s 64.14%, p 35.81%                                                      |      |
| LP(1)*Ti                                                              | 0.14054                                                  | s 100%                                                                  |      |
| LP(2)*Ti                                                              | 0.08912                                                  | d 100%                                                                  |      |
| LP(3)*Ti                                                              | 0.08908                                                  | d 100%                                                                  |      |
| LP(4)*Ti                                                              | 0.08533                                                  | p 99.88%                                                                |      |
| LP(5)*Ti                                                              | 0.08525                                                  | p 99.88%                                                                |      |
| LP(5)*Ti                                                              | 0.08523                                                  | d 100%                                                                  |      |
| Second Order Perturbation analysis:                                   |                                                          |                                                                         |      |
| No obvious stabilization interactions associated with charge transfer |                                                          |                                                                         |      |
